# Supplementary material for: Individual experience influences reconstruction of division of labour under colony disturbance in a queenless ant species
Source: Research Square preprint supplement (doi:10.21203/rs.3.rs-1629564/v1), 2022-05-12
Supplement: Supplementary file 1 [file e343fa0af45eeea1b369e070.csv]

Individual_ID	Colony	Treatment	Day	Focal_task_not_doing	Focal_task_doing	Total	Focal_task
100	NO11	PFSN	1	1	0	1	F
100	NO11	PFSN	2	1	0	1	F
100	NO11	PFSN	3	1	0	1	F
100	NO11	PFSN	4	1	0	1	F
100	NO11	PFSN	11	1	0	1	F
100	NO11	PFSN	12	1	0	1	F
100	NO11	PFSN	18	1	0	1	F
100	NO11	PFSN	19	1	0	1	F
102	NO11	PFSN	1	1	0	1	F
102	NO11	PFSN	2	1	0	1	F
102	NO11	PFSN	3	1	0	1	F
102	NO11	PFSN	4	1	0	1	F
102	NO11	PFSN	11	1	0	1	F
102	NO11	PFSN	12	1	0	1	F
102	NO11	PFSN	18	1	0	1	F
102	NO11	PFSN	19	1	0	1	F
103	NO11	PFSN	1	1	0	1	F
103	NO11	PFSN	2	1	0	1	F
103	NO11	PFSN	3	1	0	1	F
103	NO11	PFSN	4	1	0	1	F
103	NO11	PFSN	11	1	0	1	F
103	NO11	PFSN	12	1	0	1	F
103	NO11	PFSN	18	1	0	1	F
103	NO11	PFSN	19	1	0	1	F
105	NO11	PFSN	1	1	0	1	F
105	NO11	PFSN	2	1	0	1	F
105	NO11	PFSN	3	1	0	1	F
105	NO11	PFSN	4	1	0	1	F
105	NO11	PFSN	11	1	0	1	F
105	NO11	PFSN	12	1	0	1	F
105	NO11	PFSN	18	1	0	1	F
105	NO11	PFSN	19	1	0	1	F
107	NO11	PFSN	1	1	0	1	F
107	NO11	PFSN	2	1	0	1	F
107	NO11	PFSN	3	1	0	1	F
107	NO11	PFSN	4	1	0	1	F
107	NO11	PFSN	11	1	0	1	F
107	NO11	PFSN	12	1	0	1	F
107	NO11	PFSN	18	1	0	1	F
107	NO11	PFSN	19	1	0	1	F
108	NO11	PFSN	1	1	0	1	F
108	NO11	PFSN	2	1	0	1	F
108	NO11	PFSN	3	1	0	1	F
108	NO11	PFSN	4	1	0	1	F
108	NO11	PFSN	11	1	0	1	F
108	NO11	PFSN	12	1	0	1	F
108	NO11	PFSN	18	1	0	1	F
108	NO11	PFSN	19	1	0	1	F
110	NO11	PFSN	1	1	0	1	F
110	NO11	PFSN	2	1	0	1	F
110	NO11	PFSN	3	1	0	1	F
110	NO11	PFSN	4	1	0	1	F
110	NO11	PFSN	11	1	0	1	F
110	NO11	PFSN	12	1	0	1	F
110	NO11	PFSN	18	1	0	1	F
110	NO11	PFSN	19	1	0	1	F
129	NO12	PFSN	1	1	0	1	F
129	NO12	PFSN	2	1	0	1	F
129	NO12	PFSN	3	1	0	1	F
129	NO12	PFSN	4	0	1	1	F
129	NO12	PFSN	11	1	0	1	F
129	NO12	PFSN	12	1	0	1	F
129	NO12	PFSN	18	1	0	1	F
129	NO12	PFSN	19	1	0	1	F
138	NO12	PFSN	1	1	0	1	F
138	NO12	PFSN	2	1	0	1	F
138	NO12	PFSN	3	1	0	1	F
138	NO12	PFSN	4	1	0	1	F
138	NO12	PFSN	11	1	0	1	F
138	NO12	PFSN	12	1	0	1	F
138	NO12	PFSN	18	1	0	1	F
138	NO12	PFSN	19	1	0	1	F
141	NO12	PFSN	1	1	0	1	F
141	NO12	PFSN	2	1	0	1	F
141	NO12	PFSN	3	1	0	1	F
141	NO12	PFSN	4	1	0	1	F
141	NO12	PFSN	11	1	0	1	F
141	NO12	PFSN	12	1	0	1	F
141	NO12	PFSN	18	1	0	1	F
141	NO12	PFSN	19	1	0	1	F
146	NO12	PFSN	1	1	0	1	F
146	NO12	PFSN	2	1	0	1	F
146	NO12	PFSN	3	1	0	1	F
146	NO12	PFSN	4	1	0	1	F
146	NO12	PFSN	11	1	0	1	F
146	NO12	PFSN	12	1	0	1	F
146	NO12	PFSN	18	1	0	1	F
146	NO12	PFSN	19	1	0	1	F
164	NO13	PFOnly	1	1	0	1	F
164	NO13	PFOnly	2	1	0	1	F
164	NO13	PFOnly	3	1	0	1	F
164	NO13	PFOnly	4	1	0	1	F
164	NO13	PFOnly	11	1	0	1	F
164	NO13	PFOnly	12	1	0	1	F
164	NO13	PFOnly	18	1	0	1	F
164	NO13	PFOnly	19	1	0	1	F
176	NO13	PFOnly	1	1	0	1	F
176	NO13	PFOnly	2	1	0	1	F
176	NO13	PFOnly	3	1	0	1	F
176	NO13	PFOnly	4	1	0	1	F
176	NO13	PFOnly	11	1	0	1	F
176	NO13	PFOnly	12	1	0	1	F
176	NO13	PFOnly	18	1	0	1	F
176	NO13	PFOnly	19	1	0	1	F
181	NO13	PFOnly	1	1	0	1	F
181	NO13	PFOnly	2	1	0	1	F
181	NO13	PFOnly	3	1	0	1	F
181	NO13	PFOnly	4	1	0	1	F
181	NO13	PFOnly	11	1	0	1	F
181	NO13	PFOnly	12	1	0	1	F
181	NO13	PFOnly	18	1	0	1	F
181	NO13	PFOnly	19	1	0	1	F
185	NO13	PFOnly	1	1	0	1	F
185	NO13	PFOnly	2	1	0	1	F
185	NO13	PFOnly	3	1	0	1	F
185	NO13	PFOnly	4	1	0	1	F
185	NO13	PFOnly	11	1	0	1	F
185	NO13	PFOnly	12	1	0	1	F
185	NO13	PFOnly	18	1	0	1	F
185	NO13	PFOnly	19	1	0	1	F
214	NO5	PFOnly	1	1	0	1	F
214	NO5	PFOnly	2	1	0	1	F
214	NO5	PFOnly	3	1	0	1	F
214	NO5	PFOnly	4	1	0	1	F
214	NO5	PFOnly	11	1	0	1	F
214	NO5	PFOnly	12	1	0	1	F
214	NO5	PFOnly	18	1	0	1	F
214	NO5	PFOnly	19	1	0	1	F
217	NO5	PFOnly	1	1	0	1	F
217	NO5	PFOnly	2	1	0	1	F
217	NO5	PFOnly	3	1	0	1	F
217	NO5	PFOnly	4	1	0	1	F
217	NO5	PFOnly	11	1	0	1	F
217	NO5	PFOnly	12	1	0	1	F
217	NO5	PFOnly	18	1	0	1	F
217	NO5	PFOnly	19	1	0	1	F
232	NO5	PFOnly	1	1	0	1	F
232	NO5	PFOnly	2	1	0	1	F
232	NO5	PFOnly	3	1	0	1	F
232	NO5	PFOnly	4	1	0	1	F
232	NO5	PFOnly	11	1	0	1	F
232	NO5	PFOnly	12	1	0	1	F
232	NO5	PFOnly	18	1	0	1	F
232	NO5	PFOnly	19	1	0	1	F
235	NO5	PFOnly	1	1	0	1	F
235	NO5	PFOnly	2	1	0	1	F
235	NO5	PFOnly	3	1	0	1	F
235	NO5	PFOnly	4	1	0	1	F
235	NO5	PFOnly	11	1	0	1	F
235	NO5	PFOnly	12	1	0	1	F
235	NO5	PFOnly	18	1	0	1	F
235	NO5	PFOnly	19	1	0	1	F
242	NO5	PFOnly	1	1	0	1	F
242	NO5	PFOnly	2	1	0	1	F
242	NO5	PFOnly	3	1	0	1	F
242	NO5	PFOnly	4	1	0	1	F
242	NO5	PFOnly	11	1	0	1	F
242	NO5	PFOnly	12	1	0	1	F
242	NO5	PFOnly	18	1	0	1	F
242	NO5	PFOnly	19	1	0	1	F
243	NO5	PFOnly	1	1	0	1	F
243	NO5	PFOnly	2	1	0	1	F
243	NO5	PFOnly	3	1	0	1	F
243	NO5	PFOnly	4	1	0	1	F
243	NO5	PFOnly	11	1	0	1	F
243	NO5	PFOnly	12	1	0	1	F
243	NO5	PFOnly	18	1	0	1	F
243	NO5	PFOnly	19	1	0	1	F
250	NO5	PFOnly	1	1	0	1	F
250	NO5	PFOnly	2	1	0	1	F
250	NO5	PFOnly	3	1	0	1	F
250	NO5	PFOnly	4	1	0	1	F
250	NO5	PFOnly	11	1	0	1	F
250	NO5	PFOnly	12	1	0	1	F
250	NO5	PFOnly	18	1	0	1	F
250	NO5	PFOnly	19	1	0	1	F
252	NO5	PFOnly	1	1	0	1	F
252	NO5	PFOnly	2	1	0	1	F
252	NO5	PFOnly	3	1	0	1	F
252	NO5	PFOnly	4	1	0	1	F
252	NO5	PFOnly	11	1	0	1	F
252	NO5	PFOnly	12	1	0	1	F
252	NO5	PFOnly	18	0	1	1	F
252	NO5	PFOnly	19	1	0	1	F
254	NO5	PFOnly	1	1	0	1	F
254	NO5	PFOnly	2	1	0	1	F
254	NO5	PFOnly	3	1	0	1	F
254	NO5	PFOnly	4	1	0	1	F
254	NO5	PFOnly	11	1	0	1	F
254	NO5	PFOnly	12	1	0	1	F
254	NO5	PFOnly	18	1	0	1	F
254	NO5	PFOnly	19	1	0	1	F
260	NO5	PFOnly	1	1	0	1	F
260	NO5	PFOnly	2	1	0	1	F
260	NO5	PFOnly	3	1	0	1	F
260	NO5	PFOnly	4	1	0	1	F
260	NO5	PFOnly	11	1	0	1	F
260	NO5	PFOnly	12	1	0	1	F
260	NO5	PFOnly	18	1	0	1	F
260	NO5	PFOnly	19	1	0	1	F
263	NO5	PFOnly	1	1	0	1	F
263	NO5	PFOnly	2	1	0	1	F
263	NO5	PFOnly	3	1	0	1	F
263	NO5	PFOnly	4	1	0	1	F
263	NO5	PFOnly	11	1	0	1	F
263	NO5	PFOnly	12	1	0	1	F
263	NO5	PFOnly	18	1	0	1	F
263	NO5	PFOnly	19	1	0	1	F
266	NO5	PFOnly	1	1	0	1	F
266	NO5	PFOnly	2	1	0	1	F
266	NO5	PFOnly	3	1	0	1	F
266	NO5	PFOnly	4	1	0	1	F
266	NO5	PFOnly	11	1	0	1	F
266	NO5	PFOnly	12	1	0	1	F
266	NO5	PFOnly	18	1	0	1	F
266	NO5	PFOnly	19	1	0	1	F
267	NO5	PFOnly	1	1	0	1	F
267	NO5	PFOnly	2	1	0	1	F
267	NO5	PFOnly	3	1	0	1	F
267	NO5	PFOnly	4	1	0	1	F
267	NO5	PFOnly	11	1	0	1	F
267	NO5	PFOnly	12	1	0	1	F
267	NO5	PFOnly	18	1	0	1	F
267	NO5	PFOnly	19	1	0	1	F
268	NO5	PFOnly	1	1	0	1	F
268	NO5	PFOnly	2	1	0	1	F
268	NO5	PFOnly	3	1	0	1	F
268	NO5	PFOnly	4	1	0	1	F
268	NO5	PFOnly	11	1	0	1	F
268	NO5	PFOnly	12	1	0	1	F
268	NO5	PFOnly	18	1	0	1	F
268	NO5	PFOnly	19	1	0	1	F
269	NO5	PFOnly	1	1	0	1	F
269	NO5	PFOnly	2	1	0	1	F
269	NO5	PFOnly	3	1	0	1	F
269	NO5	PFOnly	4	1	0	1	F
269	NO5	PFOnly	11	1	0	1	F
269	NO5	PFOnly	12	1	0	1	F
269	NO5	PFOnly	18	1	0	1	F
269	NO5	PFOnly	19	1	0	1	F
271	NO5	PFOnly	1	1	0	1	F
271	NO5	PFOnly	2	1	0	1	F
271	NO5	PFOnly	3	1	0	1	F
271	NO5	PFOnly	4	1	0	1	F
271	NO5	PFOnly	11	1	0	1	F
271	NO5	PFOnly	12	1	0	1	F
271	NO5	PFOnly	18	1	0	1	F
271	NO5	PFOnly	19	1	0	1	F
272	NO5	PFOnly	1	1	0	1	F
272	NO5	PFOnly	2	1	0	1	F
272	NO5	PFOnly	3	1	0	1	F
272	NO5	PFOnly	4	1	0	1	F
272	NO5	PFOnly	11	1	0	1	F
272	NO5	PFOnly	12	1	0	1	F
272	NO5	PFOnly	18	1	0	1	F
272	NO5	PFOnly	19	1	0	1	F
273	NO5	PFOnly	1	1	0	1	F
273	NO5	PFOnly	2	1	0	1	F
273	NO5	PFOnly	3	1	0	1	F
273	NO5	PFOnly	4	1	0	1	F
273	NO5	PFOnly	11	1	0	1	F
273	NO5	PFOnly	12	1	0	1	F
273	NO5	PFOnly	18	1	0	1	F
273	NO5	PFOnly	19	1	0	1	F
274	NO5	PFOnly	1	1	0	1	F
274	NO5	PFOnly	2	1	0	1	F
274	NO5	PFOnly	3	1	0	1	F
274	NO5	PFOnly	4	1	0	1	F
274	NO5	PFOnly	11	1	0	1	F
274	NO5	PFOnly	12	1	0	1	F
274	NO5	PFOnly	18	1	0	1	F
274	NO5	PFOnly	19	1	0	1	F
309	NO6	PFSN	1	1	0	1	F
309	NO6	PFSN	2	1	0	1	F
309	NO6	PFSN	3	1	0	1	F
309	NO6	PFSN	4	1	0	1	F
309	NO6	PFSN	11	1	0	1	F
309	NO6	PFSN	12	1	0	1	F
309	NO6	PFSN	18	1	0	1	F
309	NO6	PFSN	19	1	0	1	F
314	NO6	PFSN	1	1	0	1	F
314	NO6	PFSN	2	1	0	1	F
314	NO6	PFSN	3	1	0	1	F
314	NO6	PFSN	4	1	0	1	F
314	NO6	PFSN	11	1	0	1	F
314	NO6	PFSN	12	1	0	1	F
314	NO6	PFSN	18	1	0	1	F
314	NO6	PFSN	19	1	0	1	F
318	NO6	PFSN	1	1	0	1	F
318	NO6	PFSN	2	0	1	1	F
318	NO6	PFSN	3	1	0	1	F
318	NO6	PFSN	4	1	0	1	F
318	NO6	PFSN	11	1	0	1	F
318	NO6	PFSN	12	1	0	1	F
318	NO6	PFSN	18	1	0	1	F
318	NO6	PFSN	19	1	0	1	F
325	NO6	PFSN	1	1	0	1	F
325	NO6	PFSN	2	1	0	1	F
325	NO6	PFSN	3	1	0	1	F
325	NO6	PFSN	4	1	0	1	F
325	NO6	PFSN	11	1	0	1	F
325	NO6	PFSN	12	1	0	1	F
325	NO6	PFSN	18	1	0	1	F
325	NO6	PFSN	19	1	0	1	F
326	NO6	PFSN	1	1	0	1	F
326	NO6	PFSN	2	1	0	1	F
326	NO6	PFSN	3	1	0	1	F
326	NO6	PFSN	4	1	0	1	F
326	NO6	PFSN	11	1	0	1	F
326	NO6	PFSN	12	1	0	1	F
326	NO6	PFSN	18	1	0	1	F
326	NO6	PFSN	19	1	0	1	F
333	NO6	PFSN	1	1	0	1	F
333	NO6	PFSN	2	1	0	1	F
333	NO6	PFSN	3	1	0	1	F
333	NO6	PFSN	4	1	0	1	F
333	NO6	PFSN	11	1	0	1	F
333	NO6	PFSN	12	1	0	1	F
333	NO6	PFSN	18	1	0	1	F
333	NO6	PFSN	19	1	0	1	F
336	NO6	PFSN	1	1	0	1	F
336	NO6	PFSN	2	1	0	1	F
336	NO6	PFSN	3	1	0	1	F
336	NO6	PFSN	4	1	0	1	F
336	NO6	PFSN	11	1	0	1	F
336	NO6	PFSN	12	1	0	1	F
336	NO6	PFSN	18	0	1	1	F
336	NO6	PFSN	19	1	0	1	F
339	NO6	PFSN	1	1	0	1	F
339	NO6	PFSN	2	1	0	1	F
339	NO6	PFSN	3	1	0	1	F
339	NO6	PFSN	4	1	0	1	F
339	NO6	PFSN	11	1	0	1	F
339	NO6	PFSN	12	1	0	1	F
339	NO6	PFSN	18	1	0	1	F
339	NO6	PFSN	19	1	0	1	F
340	NO6	PFSN	1	1	0	1	F
340	NO6	PFSN	2	1	0	1	F
340	NO6	PFSN	3	1	0	1	F
340	NO6	PFSN	4	1	0	1	F
340	NO6	PFSN	11	1	0	1	F
340	NO6	PFSN	12	1	0	1	F
340	NO6	PFSN	18	1	0	1	F
340	NO6	PFSN	19	1	0	1	F
342	NO6	PFSN	1	1	0	1	F
342	NO6	PFSN	2	1	0	1	F
342	NO6	PFSN	3	1	0	1	F
342	NO6	PFSN	4	1	0	1	F
342	NO6	PFSN	11	1	0	1	F
342	NO6	PFSN	12	1	0	1	F
342	NO6	PFSN	18	1	0	1	F
342	NO6	PFSN	19	1	0	1	F
344	NO6	PFSN	1	1	0	1	F
344	NO6	PFSN	2	1	0	1	F
344	NO6	PFSN	3	1	0	1	F
344	NO6	PFSN	4	1	0	1	F
344	NO6	PFSN	11	1	0	1	F
344	NO6	PFSN	12	1	0	1	F
344	NO6	PFSN	18	1	0	1	F
344	NO6	PFSN	19	1	0	1	F
347	NO6	PFSN	1	1	0	1	F
347	NO6	PFSN	2	1	0	1	F
347	NO6	PFSN	3	1	0	1	F
347	NO6	PFSN	4	1	0	1	F
347	NO6	PFSN	11	1	0	1	F
347	NO6	PFSN	12	1	0	1	F
347	NO6	PFSN	18	1	0	1	F
347	NO6	PFSN	19	1	0	1	F
348	NO6	PFSN	1	1	0	1	F
348	NO6	PFSN	2	1	0	1	F
348	NO6	PFSN	3	1	0	1	F
348	NO6	PFSN	4	1	0	1	F
348	NO6	PFSN	11	1	0	1	F
348	NO6	PFSN	12	1	0	1	F
348	NO6	PFSN	18	1	0	1	F
348	NO6	PFSN	19	1	0	1	F
349	NO6	PFSN	1	1	0	1	F
349	NO6	PFSN	2	1	0	1	F
349	NO6	PFSN	3	1	0	1	F
349	NO6	PFSN	4	1	0	1	F
349	NO6	PFSN	11	1	0	1	F
349	NO6	PFSN	12	1	0	1	F
349	NO6	PFSN	18	1	0	1	F
349	NO6	PFSN	19	1	0	1	F
350	NO7	PFOnly	1	1	0	1	F
350	NO7	PFOnly	2	1	0	1	F
350	NO7	PFOnly	3	1	0	1	F
350	NO7	PFOnly	4	1	0	1	F
350	NO7	PFOnly	11	1	0	1	F
350	NO7	PFOnly	12	1	0	1	F
350	NO7	PFOnly	18	1	0	1	F
350	NO7	PFOnly	19	1	0	1	F
355	NO7	PFOnly	1	1	0	1	F
355	NO7	PFOnly	2	1	0	1	F
355	NO7	PFOnly	3	1	0	1	F
355	NO7	PFOnly	4	1	0	1	F
355	NO7	PFOnly	11	1	0	1	F
355	NO7	PFOnly	12	1	0	1	F
355	NO7	PFOnly	18	1	0	1	F
355	NO7	PFOnly	19	1	0	1	F
364	NO7	PFOnly	1	1	0	1	F
364	NO7	PFOnly	2	1	0	1	F
364	NO7	PFOnly	3	1	0	1	F
364	NO7	PFOnly	4	1	0	1	F
364	NO7	PFOnly	11	1	0	1	F
364	NO7	PFOnly	12	1	0	1	F
364	NO7	PFOnly	18	1	0	1	F
364	NO7	PFOnly	19	1	0	1	F
367	NO7	PFOnly	1	1	0	1	F
367	NO7	PFOnly	2	1	0	1	F
367	NO7	PFOnly	3	1	0	1	F
367	NO7	PFOnly	4	1	0	1	F
367	NO7	PFOnly	11	1	0	1	F
367	NO7	PFOnly	12	1	0	1	F
367	NO7	PFOnly	18	1	0	1	F
367	NO7	PFOnly	19	1	0	1	F
369	NO7	PFOnly	1	1	0	1	F
369	NO7	PFOnly	2	1	0	1	F
369	NO7	PFOnly	3	1	0	1	F
369	NO7	PFOnly	4	1	0	1	F
369	NO7	PFOnly	11	1	0	1	F
369	NO7	PFOnly	12	1	0	1	F
369	NO7	PFOnly	18	1	0	1	F
369	NO7	PFOnly	19	1	0	1	F
371	NO7	PFOnly	1	1	0	1	F
371	NO7	PFOnly	2	1	0	1	F
371	NO7	PFOnly	3	1	0	1	F
371	NO7	PFOnly	4	1	0	1	F
371	NO7	PFOnly	11	1	0	1	F
371	NO7	PFOnly	12	1	0	1	F
371	NO7	PFOnly	18	1	0	1	F
371	NO7	PFOnly	19	1	0	1	F
379	NO7	PFOnly	1	1	0	1	F
379	NO7	PFOnly	2	1	0	1	F
379	NO7	PFOnly	3	1	0	1	F
379	NO7	PFOnly	4	1	0	1	F
379	NO7	PFOnly	11	1	0	1	F
379	NO7	PFOnly	12	1	0	1	F
379	NO7	PFOnly	18	1	0	1	F
379	NO7	PFOnly	19	1	0	1	F
382	NO7	PFOnly	1	1	0	1	F
382	NO7	PFOnly	2	1	0	1	F
382	NO7	PFOnly	3	1	0	1	F
382	NO7	PFOnly	4	1	0	1	F
382	NO7	PFOnly	11	1	0	1	F
382	NO7	PFOnly	12	1	0	1	F
382	NO7	PFOnly	18	1	0	1	F
382	NO7	PFOnly	19	1	0	1	F
383	NO7	PFOnly	1	1	0	1	F
383	NO7	PFOnly	2	1	0	1	F
383	NO7	PFOnly	3	1	0	1	F
383	NO7	PFOnly	4	1	0	1	F
383	NO7	PFOnly	11	1	0	1	F
383	NO7	PFOnly	12	1	0	1	F
383	NO7	PFOnly	18	1	0	1	F
383	NO7	PFOnly	19	1	0	1	F
385	NO7	PFOnly	1	1	0	1	F
385	NO7	PFOnly	2	1	0	1	F
385	NO7	PFOnly	3	1	0	1	F
385	NO7	PFOnly	4	1	0	1	F
385	NO7	PFOnly	11	1	0	1	F
385	NO7	PFOnly	12	1	0	1	F
385	NO7	PFOnly	18	1	0	1	F
385	NO7	PFOnly	19	1	0	1	F
388	NO7	PFOnly	1	1	0	1	F
388	NO7	PFOnly	2	1	0	1	F
388	NO7	PFOnly	3	1	0	1	F
388	NO7	PFOnly	4	1	0	1	F
388	NO7	PFOnly	11	1	0	1	F
388	NO7	PFOnly	12	1	0	1	F
388	NO7	PFOnly	18	1	0	1	F
388	NO7	PFOnly	19	1	0	1	F
391	NO7	PFOnly	1	1	0	1	F
391	NO7	PFOnly	2	1	0	1	F
391	NO7	PFOnly	3	1	0	1	F
391	NO7	PFOnly	4	1	0	1	F
391	NO7	PFOnly	11	1	0	1	F
391	NO7	PFOnly	12	1	0	1	F
391	NO7	PFOnly	18	1	0	1	F
391	NO7	PFOnly	19	1	0	1	F
62	NO10	PFSN	1	1	0	1	F
62	NO10	PFSN	2	1	0	1	F
62	NO10	PFSN	3	1	0	1	F
62	NO10	PFSN	4	1	0	1	F
62	NO10	PFSN	11	1	0	1	F
62	NO10	PFSN	12	0	1	1	F
62	NO10	PFSN	18	1	0	1	F
62	NO10	PFSN	19	0	1	1	F
68	NO10	PFSN	1	1	0	1	F
68	NO10	PFSN	2	1	0	1	F
68	NO10	PFSN	3	1	0	1	F
68	NO10	PFSN	4	1	0	1	F
68	NO10	PFSN	11	1	0	1	F
68	NO10	PFSN	12	1	0	1	F
68	NO10	PFSN	18	1	0	1	F
68	NO10	PFSN	19	1	0	1	F
76	NO10	PFSN	1	1	0	1	F
76	NO10	PFSN	2	1	0	1	F
76	NO10	PFSN	3	1	0	1	F
76	NO10	PFSN	4	1	0	1	F
76	NO10	PFSN	11	1	0	1	F
76	NO10	PFSN	12	1	0	1	F
76	NO10	PFSN	18	1	0	1	F
76	NO10	PFSN	19	1	0	1	F
77	NO10	PFSN	1	1	0	1	F
77	NO10	PFSN	2	1	0	1	F
77	NO10	PFSN	3	1	0	1	F
77	NO10	PFSN	4	1	0	1	F
77	NO10	PFSN	11	1	0	1	F
77	NO10	PFSN	12	1	0	1	F
77	NO10	PFSN	18	1	0	1	F
77	NO10	PFSN	19	1	0	1	F
90	NO11	PFSN	1	1	0	1	F
90	NO11	PFSN	2	1	0	1	F
90	NO11	PFSN	3	1	0	1	F
90	NO11	PFSN	4	1	0	1	F
90	NO11	PFSN	11	1	0	1	F
90	NO11	PFSN	12	1	0	1	F
90	NO11	PFSN	18	0	1	1	F
90	NO11	PFSN	19	1	0	1	F
92	NO11	PFSN	1	1	0	1	F
92	NO11	PFSN	2	1	0	1	F
92	NO11	PFSN	3	1	0	1	F
92	NO11	PFSN	4	1	0	1	F
92	NO11	PFSN	11	1	0	1	F
92	NO11	PFSN	12	1	0	1	F
92	NO11	PFSN	18	1	0	1	F
92	NO11	PFSN	19	1	0	1	F
93	NO11	PFSN	1	1	0	1	F
93	NO11	PFSN	2	1	0	1	F
93	NO11	PFSN	3	1	0	1	F
93	NO11	PFSN	4	1	0	1	F
93	NO11	PFSN	11	1	0	1	F
93	NO11	PFSN	12	1	0	1	F
93	NO11	PFSN	18	1	0	1	F
93	NO11	PFSN	19	1	0	1	F
94	NO11	PFSN	1	1	0	1	F
94	NO11	PFSN	2	1	0	1	F
94	NO11	PFSN	3	1	0	1	F
94	NO11	PFSN	4	1	0	1	F
94	NO11	PFSN	11	1	0	1	F
94	NO11	PFSN	12	1	0	1	F
94	NO11	PFSN	18	1	0	1	F
94	NO11	PFSN	19	1	0	1	F
97	NO11	PFSN	1	1	0	1	F
97	NO11	PFSN	2	1	0	1	F
97	NO11	PFSN	3	1	0	1	F
97	NO11	PFSN	4	1	0	1	F
97	NO11	PFSN	11	1	0	1	F
97	NO11	PFSN	12	1	0	1	F
97	NO11	PFSN	18	1	0	1	F
97	NO11	PFSN	19	1	0	1	F
99	NO11	PFSN	1	1	0	1	F
99	NO11	PFSN	2	1	0	1	F
99	NO11	PFSN	3	1	0	1	F
99	NO11	PFSN	4	1	0	1	F
99	NO11	PFSN	11	1	0	1	F
99	NO11	PFSN	12	1	0	1	F
99	NO11	PFSN	18	1	0	1	F
99	NO11	PFSN	19	1	0	1	F
100	NO11	PFSN	1	0	1	1	N
100	NO11	PFSN	2	0	1	1	N
100	NO11	PFSN	3	0	1	1	N
100	NO11	PFSN	4	0	1	1	N
100	NO11	PFSN	11	0	1	1	N
100	NO11	PFSN	12	0	1	1	N
100	NO11	PFSN	18	0	1	1	N
100	NO11	PFSN	19	0	1	1	N
102	NO11	PFSN	1	0	1	1	N
102	NO11	PFSN	2	0	1	1	N
102	NO11	PFSN	3	0	1	1	N
102	NO11	PFSN	4	0	1	1	N
102	NO11	PFSN	11	0	1	1	N
102	NO11	PFSN	12	0	1	1	N
102	NO11	PFSN	18	1	0	1	N
102	NO11	PFSN	19	1	0	1	N
103	NO11	PFSN	1	0	1	1	N
103	NO11	PFSN	2	0	1	1	N
103	NO11	PFSN	3	0	1	1	N
103	NO11	PFSN	4	0	1	1	N
103	NO11	PFSN	11	0	1	1	N
103	NO11	PFSN	12	1	0	1	N
103	NO11	PFSN	18	0	1	1	N
103	NO11	PFSN	19	1	0	1	N
105	NO11	PFSN	1	0	1	1	N
105	NO11	PFSN	2	1	0	1	N
105	NO11	PFSN	3	1	0	1	N
105	NO11	PFSN	4	0	1	1	N
105	NO11	PFSN	11	1	0	1	N
105	NO11	PFSN	12	1	0	1	N
105	NO11	PFSN	18	0	1	1	N
105	NO11	PFSN	19	0	1	1	N
107	NO11	PFSN	1	1	0	1	N
107	NO11	PFSN	2	1	0	1	N
107	NO11	PFSN	3	1	0	1	N
107	NO11	PFSN	4	1	0	1	N
107	NO11	PFSN	11	1	0	1	N
107	NO11	PFSN	12	1	0	1	N
107	NO11	PFSN	18	1	0	1	N
107	NO11	PFSN	19	1	0	1	N
108	NO11	PFSN	1	1	0	1	N
108	NO11	PFSN	2	0	1	1	N
108	NO11	PFSN	3	0	1	1	N
108	NO11	PFSN	4	0	1	1	N
108	NO11	PFSN	11	0	1	1	N
108	NO11	PFSN	12	0	1	1	N
108	NO11	PFSN	18	0	1	1	N
108	NO11	PFSN	19	1	0	1	N
110	NO11	PFSN	1	0	1	1	N
110	NO11	PFSN	2	0	1	1	N
110	NO11	PFSN	3	0	1	1	N
110	NO11	PFSN	4	1	0	1	N
110	NO11	PFSN	11	1	0	1	N
110	NO11	PFSN	12	0	1	1	N
110	NO11	PFSN	18	1	0	1	N
110	NO11	PFSN	19	1	0	1	N
129	NO12	PFSN	1	1	0	1	N
129	NO12	PFSN	2	1	0	1	N
129	NO12	PFSN	3	1	0	1	N
129	NO12	PFSN	4	1	0	1	N
129	NO12	PFSN	11	0	1	1	N
129	NO12	PFSN	12	1	0	1	N
129	NO12	PFSN	18	0	1	1	N
129	NO12	PFSN	19	1	0	1	N
138	NO12	PFSN	1	0	1	1	N
138	NO12	PFSN	2	1	0	1	N
138	NO12	PFSN	3	1	0	1	N
138	NO12	PFSN	4	1	0	1	N
138	NO12	PFSN	11	0	1	1	N
138	NO12	PFSN	12	0	1	1	N
138	NO12	PFSN	18	0	1	1	N
138	NO12	PFSN	19	1	0	1	N
141	NO12	PFSN	1	0	1	1	N
141	NO12	PFSN	2	0	1	1	N
141	NO12	PFSN	3	0	1	1	N
141	NO12	PFSN	4	0	1	1	N
141	NO12	PFSN	11	0	1	1	N
141	NO12	PFSN	12	0	1	1	N
141	NO12	PFSN	18	0	1	1	N
141	NO12	PFSN	19	0	1	1	N
146	NO12	PFSN	1	1	0	1	N
146	NO12	PFSN	2	1	0	1	N
146	NO12	PFSN	3	1	0	1	N
146	NO12	PFSN	4	1	0	1	N
146	NO12	PFSN	11	1	0	1	N
146	NO12	PFSN	12	1	0	1	N
146	NO12	PFSN	18	1	0	1	N
146	NO12	PFSN	19	1	0	1	N
164	NO13	PFOnly	1	1	0	1	N
164	NO13	PFOnly	2	1	0	1	N
164	NO13	PFOnly	3	1	0	1	N
164	NO13	PFOnly	4	1	0	1	N
164	NO13	PFOnly	11	1	0	1	N
164	NO13	PFOnly	12	1	0	1	N
164	NO13	PFOnly	18	1	0	1	N
164	NO13	PFOnly	19	0	1	1	N
176	NO13	PFOnly	1	0	1	1	N
176	NO13	PFOnly	2	1	0	1	N
176	NO13	PFOnly	3	0	1	1	N
176	NO13	PFOnly	4	0	1	1	N
176	NO13	PFOnly	11	1	0	1	N
176	NO13	PFOnly	12	0	1	1	N
176	NO13	PFOnly	18	0	1	1	N
176	NO13	PFOnly	19	0	1	1	N
181	NO13	PFOnly	1	0	1	1	N
181	NO13	PFOnly	2	0	1	1	N
181	NO13	PFOnly	3	1	0	1	N
181	NO13	PFOnly	4	0	1	1	N
181	NO13	PFOnly	11	0	1	1	N
181	NO13	PFOnly	12	1	0	1	N
181	NO13	PFOnly	18	0	1	1	N
181	NO13	PFOnly	19	0	1	1	N
185	NO13	PFOnly	1	0	1	1	N
185	NO13	PFOnly	2	0	1	1	N
185	NO13	PFOnly	3	0	1	1	N
185	NO13	PFOnly	4	0	1	1	N
185	NO13	PFOnly	11	0	1	1	N
185	NO13	PFOnly	12	0	1	1	N
185	NO13	PFOnly	18	0	1	1	N
185	NO13	PFOnly	19	0	1	1	N
214	NO5	PFOnly	1	1	0	1	N
214	NO5	PFOnly	2	1	0	1	N
214	NO5	PFOnly	3	1	0	1	N
214	NO5	PFOnly	4	1	0	1	N
214	NO5	PFOnly	11	1	0	1	N
214	NO5	PFOnly	12	1	0	1	N
214	NO5	PFOnly	18	1	0	1	N
214	NO5	PFOnly	19	1	0	1	N
217	NO5	PFOnly	1	0	1	1	N
217	NO5	PFOnly	2	0	1	1	N
217	NO5	PFOnly	3	0	1	1	N
217	NO5	PFOnly	4	0	1	1	N
217	NO5	PFOnly	11	0	1	1	N
217	NO5	PFOnly	12	1	0	1	N
217	NO5	PFOnly	18	0	1	1	N
217	NO5	PFOnly	19	1	0	1	N
232	NO5	PFOnly	1	0	1	1	N
232	NO5	PFOnly	2	0	1	1	N
232	NO5	PFOnly	3	0	1	1	N
232	NO5	PFOnly	4	0	1	1	N
232	NO5	PFOnly	11	0	1	1	N
232	NO5	PFOnly	12	0	1	1	N
232	NO5	PFOnly	18	0	1	1	N
232	NO5	PFOnly	19	0	1	1	N
235	NO5	PFOnly	1	0	1	1	N
235	NO5	PFOnly	2	0	1	1	N
235	NO5	PFOnly	3	0	1	1	N
235	NO5	PFOnly	4	0	1	1	N
235	NO5	PFOnly	11	0	1	1	N
235	NO5	PFOnly	12	0	1	1	N
235	NO5	PFOnly	18	0	1	1	N
235	NO5	PFOnly	19	1	0	1	N
242	NO5	PFOnly	1	1	0	1	N
242	NO5	PFOnly	2	1	0	1	N
242	NO5	PFOnly	3	1	0	1	N
242	NO5	PFOnly	4	1	0	1	N
242	NO5	PFOnly	11	1	0	1	N
242	NO5	PFOnly	12	1	0	1	N
242	NO5	PFOnly	18	1	0	1	N
242	NO5	PFOnly	19	1	0	1	N
243	NO5	PFOnly	1	0	1	1	N
243	NO5	PFOnly	2	1	0	1	N
243	NO5	PFOnly	3	1	0	1	N
243	NO5	PFOnly	4	1	0	1	N
243	NO5	PFOnly	11	1	0	1	N
243	NO5	PFOnly	12	1	0	1	N
243	NO5	PFOnly	18	1	0	1	N
243	NO5	PFOnly	19	1	0	1	N
250	NO5	PFOnly	1	1	0	1	N
250	NO5	PFOnly	2	0	1	1	N
250	NO5	PFOnly	3	0	1	1	N
250	NO5	PFOnly	4	0	1	1	N
250	NO5	PFOnly	11	0	1	1	N
250	NO5	PFOnly	12	0	1	1	N
250	NO5	PFOnly	18	1	0	1	N
250	NO5	PFOnly	19	0	1	1	N
252	NO5	PFOnly	1	0	1	1	N
252	NO5	PFOnly	2	0	1	1	N
252	NO5	PFOnly	3	0	1	1	N
252	NO5	PFOnly	4	0	1	1	N
252	NO5	PFOnly	11	0	1	1	N
252	NO5	PFOnly	12	0	1	1	N
252	NO5	PFOnly	18	1	0	1	N
252	NO5	PFOnly	19	0	1	1	N
254	NO5	PFOnly	1	0	1	1	N
254	NO5	PFOnly	2	0	1	1	N
254	NO5	PFOnly	3	0	1	1	N
254	NO5	PFOnly	4	0	1	1	N
254	NO5	PFOnly	11	0	1	1	N
254	NO5	PFOnly	12	0	1	1	N
254	NO5	PFOnly	18	0	1	1	N
254	NO5	PFOnly	19	0	1	1	N
260	NO5	PFOnly	1	1	0	1	N
260	NO5	PFOnly	2	1	0	1	N
260	NO5	PFOnly	3	1	0	1	N
260	NO5	PFOnly	4	1	0	1	N
260	NO5	PFOnly	11	1	0	1	N
260	NO5	PFOnly	12	1	0	1	N
260	NO5	PFOnly	18	1	0	1	N
260	NO5	PFOnly	19	1	0	1	N
263	NO5	PFOnly	1	0	1	1	N
263	NO5	PFOnly	2	0	1	1	N
263	NO5	PFOnly	3	0	1	1	N
263	NO5	PFOnly	4	0	1	1	N
263	NO5	PFOnly	11	0	1	1	N
263	NO5	PFOnly	12	0	1	1	N
263	NO5	PFOnly	18	0	1	1	N
263	NO5	PFOnly	19	1	0	1	N
266	NO5	PFOnly	1	1	0	1	N
266	NO5	PFOnly	2	1	0	1	N
266	NO5	PFOnly	3	1	0	1	N
266	NO5	PFOnly	4	1	0	1	N
266	NO5	PFOnly	11	1	0	1	N
266	NO5	PFOnly	12	1	0	1	N
266	NO5	PFOnly	18	1	0	1	N
266	NO5	PFOnly	19	1	0	1	N
267	NO5	PFOnly	1	0	1	1	N
267	NO5	PFOnly	2	0	1	1	N
267	NO5	PFOnly	3	0	1	1	N
267	NO5	PFOnly	4	0	1	1	N
267	NO5	PFOnly	11	0	1	1	N
267	NO5	PFOnly	12	0	1	1	N
267	NO5	PFOnly	18	0	1	1	N
267	NO5	PFOnly	19	0	1	1	N
268	NO5	PFOnly	1	1	0	1	N
268	NO5	PFOnly	2	1	0	1	N
268	NO5	PFOnly	3	1	0	1	N
268	NO5	PFOnly	4	1	0	1	N
268	NO5	PFOnly	11	1	0	1	N
268	NO5	PFOnly	12	1	0	1	N
268	NO5	PFOnly	18	1	0	1	N
268	NO5	PFOnly	19	1	0	1	N
269	NO5	PFOnly	1	1	0	1	N
269	NO5	PFOnly	2	1	0	1	N
269	NO5	PFOnly	3	1	0	1	N
269	NO5	PFOnly	4	1	0	1	N
269	NO5	PFOnly	11	1	0	1	N
269	NO5	PFOnly	12	1	0	1	N
269	NO5	PFOnly	18	1	0	1	N
269	NO5	PFOnly	19	1	0	1	N
271	NO5	PFOnly	1	1	0	1	N
271	NO5	PFOnly	2	0	1	1	N
271	NO5	PFOnly	3	0	1	1	N
271	NO5	PFOnly	4	0	1	1	N
271	NO5	PFOnly	11	0	1	1	N
271	NO5	PFOnly	12	0	1	1	N
271	NO5	PFOnly	18	0	1	1	N
271	NO5	PFOnly	19	1	0	1	N
272	NO5	PFOnly	1	1	0	1	N
272	NO5	PFOnly	2	1	0	1	N
272	NO5	PFOnly	3	1	0	1	N
272	NO5	PFOnly	4	1	0	1	N
272	NO5	PFOnly	11	1	0	1	N
272	NO5	PFOnly	12	1	0	1	N
272	NO5	PFOnly	18	1	0	1	N
272	NO5	PFOnly	19	1	0	1	N
273	NO5	PFOnly	1	0	1	1	N
273	NO5	PFOnly	2	0	1	1	N
273	NO5	PFOnly	3	0	1	1	N
273	NO5	PFOnly	4	0	1	1	N
273	NO5	PFOnly	11	0	1	1	N
273	NO5	PFOnly	12	0	1	1	N
273	NO5	PFOnly	18	0	1	1	N
273	NO5	PFOnly	19	0	1	1	N
274	NO5	PFOnly	1	0	1	1	N
274	NO5	PFOnly	2	0	1	1	N
274	NO5	PFOnly	3	0	1	1	N
274	NO5	PFOnly	4	0	1	1	N
274	NO5	PFOnly	11	0	1	1	N
274	NO5	PFOnly	12	0	1	1	N
274	NO5	PFOnly	18	0	1	1	N
274	NO5	PFOnly	19	0	1	1	N
309	NO6	PFSN	1	1	0	1	N
309	NO6	PFSN	2	1	0	1	N
309	NO6	PFSN	3	1	0	1	N
309	NO6	PFSN	4	1	0	1	N
309	NO6	PFSN	11	1	0	1	N
309	NO6	PFSN	12	1	0	1	N
309	NO6	PFSN	18	1	0	1	N
309	NO6	PFSN	19	1	0	1	N
314	NO6	PFSN	1	1	0	1	N
314	NO6	PFSN	2	1	0	1	N
314	NO6	PFSN	3	1	0	1	N
314	NO6	PFSN	4	1	0	1	N
314	NO6	PFSN	11	1	0	1	N
314	NO6	PFSN	12	1	0	1	N
314	NO6	PFSN	18	0	1	1	N
314	NO6	PFSN	19	1	0	1	N
318	NO6	PFSN	1	1	0	1	N
318	NO6	PFSN	2	1	0	1	N
318	NO6	PFSN	3	1	0	1	N
318	NO6	PFSN	4	1	0	1	N
318	NO6	PFSN	11	1	0	1	N
318	NO6	PFSN	12	1	0	1	N
318	NO6	PFSN	18	1	0	1	N
318	NO6	PFSN	19	1	0	1	N
325	NO6	PFSN	1	1	0	1	N
325	NO6	PFSN	2	1	0	1	N
325	NO6	PFSN	3	1	0	1	N
325	NO6	PFSN	4	1	0	1	N
325	NO6	PFSN	11	1	0	1	N
325	NO6	PFSN	12	1	0	1	N
325	NO6	PFSN	18	1	0	1	N
325	NO6	PFSN	19	1	0	1	N
326	NO6	PFSN	1	1	0	1	N
326	NO6	PFSN	2	1	0	1	N
326	NO6	PFSN	3	1	0	1	N
326	NO6	PFSN	4	1	0	1	N
326	NO6	PFSN	11	1	0	1	N
326	NO6	PFSN	12	1	0	1	N
326	NO6	PFSN	18	1	0	1	N
326	NO6	PFSN	19	1	0	1	N
333	NO6	PFSN	1	1	0	1	N
333	NO6	PFSN	2	1	0	1	N
333	NO6	PFSN	3	1	0	1	N
333	NO6	PFSN	4	1	0	1	N
333	NO6	PFSN	11	1	0	1	N
333	NO6	PFSN	12	1	0	1	N
333	NO6	PFSN	18	1	0	1	N
333	NO6	PFSN	19	1	0	1	N
336	NO6	PFSN	1	1	0	1	N
336	NO6	PFSN	2	0	1	1	N
336	NO6	PFSN	3	1	0	1	N
336	NO6	PFSN	4	1	0	1	N
336	NO6	PFSN	11	1	0	1	N
336	NO6	PFSN	12	1	0	1	N
336	NO6	PFSN	18	1	0	1	N
336	NO6	PFSN	19	1	0	1	N
339	NO6	PFSN	1	1	0	1	N
339	NO6	PFSN	2	1	0	1	N
339	NO6	PFSN	3	1	0	1	N
339	NO6	PFSN	4	1	0	1	N
339	NO6	PFSN	11	1	0	1	N
339	NO6	PFSN	12	1	0	1	N
339	NO6	PFSN	18	1	0	1	N
339	NO6	PFSN	19	1	0	1	N
340	NO6	PFSN	1	0	1	1	N
340	NO6	PFSN	2	0	1	1	N
340	NO6	PFSN	3	1	0	1	N
340	NO6	PFSN	4	1	0	1	N
340	NO6	PFSN	11	0	1	1	N
340	NO6	PFSN	12	1	0	1	N
340	NO6	PFSN	18	1	0	1	N
340	NO6	PFSN	19	1	0	1	N
342	NO6	PFSN	1	1	0	1	N
342	NO6	PFSN	2	1	0	1	N
342	NO6	PFSN	3	1	0	1	N
342	NO6	PFSN	4	1	0	1	N
342	NO6	PFSN	11	1	0	1	N
342	NO6	PFSN	12	1	0	1	N
342	NO6	PFSN	18	1	0	1	N
342	NO6	PFSN	19	1	0	1	N
344	NO6	PFSN	1	0	1	1	N
344	NO6	PFSN	2	1	0	1	N
344	NO6	PFSN	3	0	1	1	N
344	NO6	PFSN	4	0	1	1	N
344	NO6	PFSN	11	0	1	1	N
344	NO6	PFSN	12	0	1	1	N
344	NO6	PFSN	18	0	1	1	N
344	NO6	PFSN	19	0	1	1	N
347	NO6	PFSN	1	0	1	1	N
347	NO6	PFSN	2	1	0	1	N
347	NO6	PFSN	3	1	0	1	N
347	NO6	PFSN	4	0	1	1	N
347	NO6	PFSN	11	0	1	1	N
347	NO6	PFSN	12	0	1	1	N
347	NO6	PFSN	18	1	0	1	N
347	NO6	PFSN	19	1	0	1	N
348	NO6	PFSN	1	0	1	1	N
348	NO6	PFSN	2	0	1	1	N
348	NO6	PFSN	3	0	1	1	N
348	NO6	PFSN	4	1	0	1	N
348	NO6	PFSN	11	0	1	1	N
348	NO6	PFSN	12	0	1	1	N
348	NO6	PFSN	18	0	1	1	N
348	NO6	PFSN	19	0	1	1	N
349	NO6	PFSN	1	0	1	1	N
349	NO6	PFSN	2	0	1	1	N
349	NO6	PFSN	3	0	1	1	N
349	NO6	PFSN	4	0	1	1	N
349	NO6	PFSN	11	0	1	1	N
349	NO6	PFSN	12	1	0	1	N
349	NO6	PFSN	18	0	1	1	N
349	NO6	PFSN	19	0	1	1	N
350	NO7	PFOnly	1	1	0	1	N
350	NO7	PFOnly	2	1	0	1	N
350	NO7	PFOnly	3	1	0	1	N
350	NO7	PFOnly	4	1	0	1	N
350	NO7	PFOnly	11	1	0	1	N
350	NO7	PFOnly	12	1	0	1	N
350	NO7	PFOnly	18	1	0	1	N
350	NO7	PFOnly	19	1	0	1	N
355	NO7	PFOnly	1	1	0	1	N
355	NO7	PFOnly	2	1	0	1	N
355	NO7	PFOnly	3	1	0	1	N
355	NO7	PFOnly	4	1	0	1	N
355	NO7	PFOnly	11	1	0	1	N
355	NO7	PFOnly	12	1	0	1	N
355	NO7	PFOnly	18	1	0	1	N
355	NO7	PFOnly	19	1	0	1	N
364	NO7	PFOnly	1	1	0	1	N
364	NO7	PFOnly	2	1	0	1	N
364	NO7	PFOnly	3	1	0	1	N
364	NO7	PFOnly	4	1	0	1	N
364	NO7	PFOnly	11	1	0	1	N
364	NO7	PFOnly	12	1	0	1	N
364	NO7	PFOnly	18	1	0	1	N
364	NO7	PFOnly	19	1	0	1	N
367	NO7	PFOnly	1	1	0	1	N
367	NO7	PFOnly	2	1	0	1	N
367	NO7	PFOnly	3	1	0	1	N
367	NO7	PFOnly	4	1	0	1	N
367	NO7	PFOnly	11	1	0	1	N
367	NO7	PFOnly	12	1	0	1	N
367	NO7	PFOnly	18	1	0	1	N
367	NO7	PFOnly	19	1	0	1	N
369	NO7	PFOnly	1	1	0	1	N
369	NO7	PFOnly	2	1	0	1	N
369	NO7	PFOnly	3	1	0	1	N
369	NO7	PFOnly	4	1	0	1	N
369	NO7	PFOnly	11	1	0	1	N
369	NO7	PFOnly	12	1	0	1	N
369	NO7	PFOnly	18	1	0	1	N
369	NO7	PFOnly	19	1	0	1	N
371	NO7	PFOnly	1	1	0	1	N
371	NO7	PFOnly	2	1	0	1	N
371	NO7	PFOnly	3	1	0	1	N
371	NO7	PFOnly	4	1	0	1	N
371	NO7	PFOnly	11	1	0	1	N
371	NO7	PFOnly	12	1	0	1	N
371	NO7	PFOnly	18	1	0	1	N
371	NO7	PFOnly	19	1	0	1	N
379	NO7	PFOnly	1	0	1	1	N
379	NO7	PFOnly	2	0	1	1	N
379	NO7	PFOnly	3	0	1	1	N
379	NO7	PFOnly	4	0	1	1	N
379	NO7	PFOnly	11	0	1	1	N
379	NO7	PFOnly	12	0	1	1	N
379	NO7	PFOnly	18	0	1	1	N
379	NO7	PFOnly	19	0	1	1	N
382	NO7	PFOnly	1	0	1	1	N
382	NO7	PFOnly	2	0	1	1	N
382	NO7	PFOnly	3	0	1	1	N
382	NO7	PFOnly	4	0	1	1	N
382	NO7	PFOnly	11	0	1	1	N
382	NO7	PFOnly	12	0	1	1	N
382	NO7	PFOnly	18	0	1	1	N
382	NO7	PFOnly	19	0	1	1	N
383	NO7	PFOnly	1	0	1	1	N
383	NO7	PFOnly	2	0	1	1	N
383	NO7	PFOnly	3	0	1	1	N
383	NO7	PFOnly	4	0	1	1	N
383	NO7	PFOnly	11	0	1	1	N
383	NO7	PFOnly	12	0	1	1	N
383	NO7	PFOnly	18	0	1	1	N
383	NO7	PFOnly	19	0	1	1	N
385	NO7	PFOnly	1	1	0	1	N
385	NO7	PFOnly	2	1	0	1	N
385	NO7	PFOnly	3	0	1	1	N
385	NO7	PFOnly	4	0	1	1	N
385	NO7	PFOnly	11	0	1	1	N
385	NO7	PFOnly	12	0	1	1	N
385	NO7	PFOnly	18	1	0	1	N
385	NO7	PFOnly	19	0	1	1	N
388	NO7	PFOnly	1	0	1	1	N
388	NO7	PFOnly	2	0	1	1	N
388	NO7	PFOnly	3	0	1	1	N
388	NO7	PFOnly	4	0	1	1	N
388	NO7	PFOnly	11	0	1	1	N
388	NO7	PFOnly	12	0	1	1	N
388	NO7	PFOnly	18	0	1	1	N
388	NO7	PFOnly	19	0	1	1	N
391	NO7	PFOnly	1	0	1	1	N
391	NO7	PFOnly	2	0	1	1	N
391	NO7	PFOnly	3	0	1	1	N
391	NO7	PFOnly	4	0	1	1	N
391	NO7	PFOnly	11	0	1	1	N
391	NO7	PFOnly	12	0	1	1	N
391	NO7	PFOnly	18	0	1	1	N
391	NO7	PFOnly	19	0	1	1	N
62	NO10	PFSN	1	0	1	1	N
62	NO10	PFSN	2	0	1	1	N
62	NO10	PFSN	3	0	1	1	N
62	NO10	PFSN	4	0	1	1	N
62	NO10	PFSN	11	0	1	1	N
62	NO10	PFSN	12	1	0	1	N
62	NO10	PFSN	18	0	1	1	N
62	NO10	PFSN	19	1	0	1	N
68	NO10	PFSN	1	0	1	1	N
68	NO10	PFSN	2	0	1	1	N
68	NO10	PFSN	3	0	1	1	N
68	NO10	PFSN	4	1	0	1	N
68	NO10	PFSN	11	1	0	1	N
68	NO10	PFSN	12	0	1	1	N
68	NO10	PFSN	18	1	0	1	N
68	NO10	PFSN	19	0	1	1	N
76	NO10	PFSN	1	0	1	1	N
76	NO10	PFSN	2	0	1	1	N
76	NO10	PFSN	3	1	0	1	N
76	NO10	PFSN	4	0	1	1	N
76	NO10	PFSN	11	0	1	1	N
76	NO10	PFSN	12	0	1	1	N
76	NO10	PFSN	18	1	0	1	N
76	NO10	PFSN	19	1	0	1	N
77	NO10	PFSN	1	1	0	1	N
77	NO10	PFSN	2	1	0	1	N
77	NO10	PFSN	3	1	0	1	N
77	NO10	PFSN	4	0	1	1	N
77	NO10	PFSN	11	0	1	1	N
77	NO10	PFSN	12	0	1	1	N
77	NO10	PFSN	18	1	0	1	N
77	NO10	PFSN	19	1	0	1	N
90	NO11	PFSN	1	1	0	1	N
90	NO11	PFSN	2	1	0	1	N
90	NO11	PFSN	3	1	0	1	N
90	NO11	PFSN	4	1	0	1	N
90	NO11	PFSN	11	1	0	1	N
90	NO11	PFSN	12	1	0	1	N
90	NO11	PFSN	18	1	0	1	N
90	NO11	PFSN	19	1	0	1	N
92	NO11	PFSN	1	0	1	1	N
92	NO11	PFSN	2	1	0	1	N
92	NO11	PFSN	3	0	1	1	N
92	NO11	PFSN	4	0	1	1	N
92	NO11	PFSN	11	1	0	1	N
92	NO11	PFSN	12	0	1	1	N
92	NO11	PFSN	18	1	0	1	N
92	NO11	PFSN	19	1	0	1	N
93	NO11	PFSN	1	1	0	1	N
93	NO11	PFSN	2	1	0	1	N
93	NO11	PFSN	3	1	0	1	N
93	NO11	PFSN	4	1	0	1	N
93	NO11	PFSN	11	1	0	1	N
93	NO11	PFSN	12	1	0	1	N
93	NO11	PFSN	18	1	0	1	N
93	NO11	PFSN	19	1	0	1	N
94	NO11	PFSN	1	0	1	1	N
94	NO11	PFSN	2	0	1	1	N
94	NO11	PFSN	3	1	0	1	N
94	NO11	PFSN	4	0	1	1	N
94	NO11	PFSN	11	1	0	1	N
94	NO11	PFSN	12	0	1	1	N
94	NO11	PFSN	18	0	1	1	N
94	NO11	PFSN	19	1	0	1	N
97	NO11	PFSN	1	0	1	1	N
97	NO11	PFSN	2	1	0	1	N
97	NO11	PFSN	3	0	1	1	N
97	NO11	PFSN	4	0	1	1	N
97	NO11	PFSN	11	0	1	1	N
97	NO11	PFSN	12	0	1	1	N
97	NO11	PFSN	18	0	1	1	N
97	NO11	PFSN	19	0	1	1	N
99	NO11	PFSN	1	1	0	1	N
99	NO11	PFSN	2	1	0	1	N
99	NO11	PFSN	3	1	0	1	N
99	NO11	PFSN	4	1	0	1	N
99	NO11	PFSN	11	1	0	1	N
99	NO11	PFSN	12	1	0	1	N
99	NO11	PFSN	18	0	1	1	N
99	NO11	PFSN	19	0	1	1	N
